# Supplementary material for: Insight into the crystal synthesis, activation and application of ZIF-20
Source: Royal Society of Chemistry journal article supplement (doi:10.1039/c1ra00164g), 2011-01-01
Supplement: c1ra00164g.pdf [file c1ra00164g.pdf]

## Supporting information

### Insight into the crystal synthesis, activation and application of ZIF-20

Beatriz Seoane<sup>1</sup>, Juan M. Zamaro<sup>2</sup>, Carlos Téllez<sup>1</sup>, and Joaquín Coronas<sup>1,\*</sup>

<sup>1</sup>Chemical and Environmental Engineering Department and Nanoscience Institute of Aragón, Universidad de Zaragoza, 50018 Zaragoza, Spain

<sup>2</sup>Instituto de Investigaciones en Catálisis y Petroquímica, INCAPE (FIQ, UNL, CONICET). Santiago del Estero 2829, 3000 Santa Fe, Argentina

\*Corresponding author: [coronas@unizar.es](mailto:coronas@unizar.es)

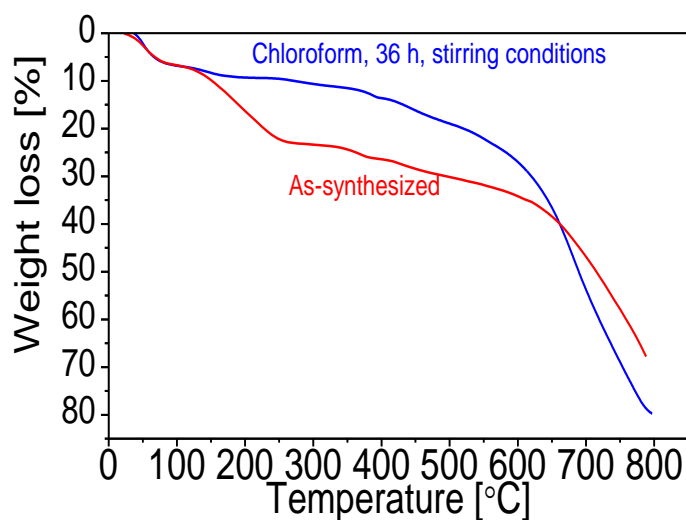

Figure S1. TGA of as-synthesized ZIF-20 and chloroform-exchanged ZIF-20 for 36 h.

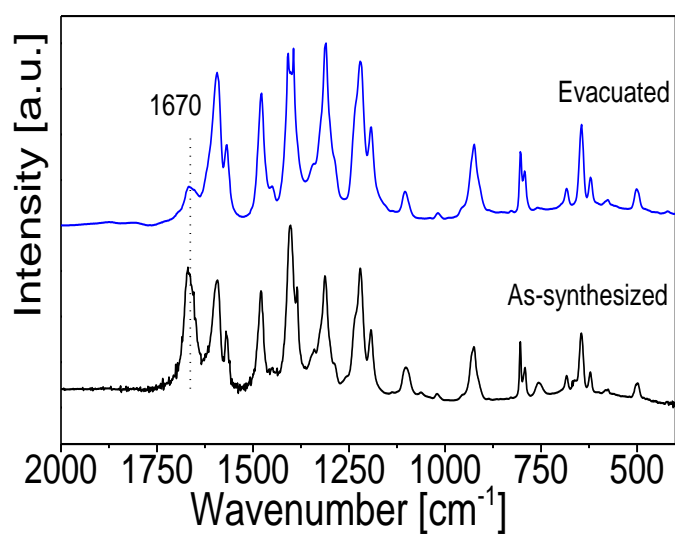

Figure S2. FTIR spectra of as-synthesized and evacuated ZIF-20 samples. The 1670 cm<sup>-1</sup> band, attributed to the C=O stretching, clearly decreases its intensity in the evacuated sample, in agreement with the TGA results.

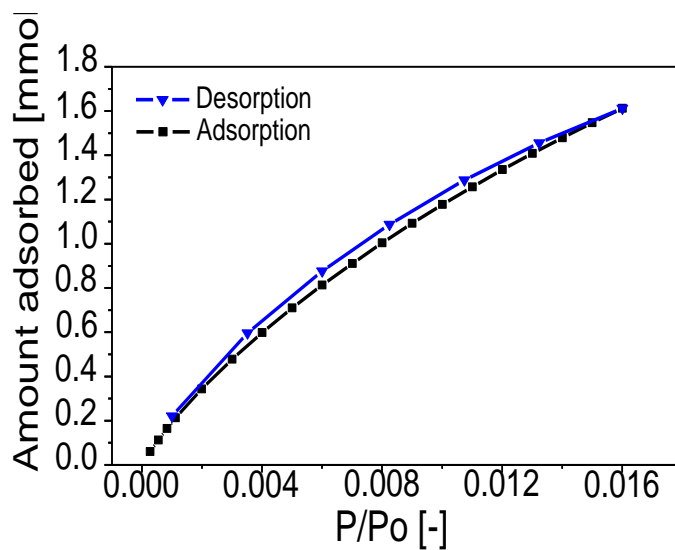

Figure S3. CO<sub>2</sub> adsorption isotherm of ZIF-20 at 25 °C.
